# Supplementary material for: Derivation of Stroke Volume from Pulmonary Artery Pressures
Source: Springer Nature journal article supplement (doi:10.1007/s40119-024-00360-x), 2024-04-25
Supplement: MOESM1 [file 27016586]

## Supplementary Material

### Derivation of Stroke Volume from Pulmonary Artery Pressures

Ivan H. W. Yim<sup>a,b</sup> FRCS (C-Th), ORCID: 0000-0003-3398-4600

Nigel E. Drury<sup>a,b</sup> PhD, FRCS (C-Th) ORCID: 0000-0001-9012-6683

\*Hoong Sern Lim<sup>a,b</sup> MD, FRCP, ORCID: 0000-0002-6569-1805

a. University Hospitals Birmingham NHS Foundation Trust, Birmingham, UK

b. Institute of Cardiovascular Sciences, University of Birmingham, Birmingham, UK.

\*Corresponding author (Email: [sern.lim@uhb.nhs.uk](mailto:sern.lim@uhb.nhs.uk))

Data from Andersen et al. The stroke volume (SV) in parentheses are derived from the calculator. NS: normal saline infusion, PAWP: pulmonary arterial wedge pressure, SVI: stroke volume index, PP: pulmonary artery pulse pressure,

|               | Controls | HFPEF   |
|---------------|----------|---------|
| PAWP (mmHg)   |          |         |
| Baseline      | 7        | 14      |
| Exercise      | 13       | 32      |
| NS            | 13       | 21      |
| PVRI (mmHg/L) |          |         |
| Baseline      | 1.8      | 1.9     |
| Exercise      | 1.2      | 1.5     |
| NS            | 1.2      | 1.8     |
| SVI (ml)      |          |         |
| Baseline      | 79 (69)  | 82 (68) |
| Exercise      | 99 (116) | 90 (93) |
| NS            | 99 (95)  | 86 (70) |
| PP (mmHg)     |          |         |
| Baseline      | 18       | 21      |
| Exercise      | 22       | 31      |
| NS            | 18       | 23      |
